# Supplementary material for: Applying the Health Belief Model to predict preference for surgical intervention versus medical therapy among patients with open-angle glaucoma
Source: HighWire-hosted journal article supplement (doi:10.1136/bmjophth-2022-001113), 2022-10-01
Supplement: bmjophth-2022-001113supp001_data_supplement.pdf [file bmjophth-2022-001113supp001_data_supplement.pdf]

## Appendix:

### Questionnaire

#### Section A: Demographic and associated variables

- 1- Age:
- 2- Sex:
  - 
  - Male
  - Female
- 3- Education:
  - University graduate
  - High school graduate
  - Primary school
  - Illiterate
- 4- Residence:
  - Urban
  - Rural
- 5- Job:
  - Employed
  - Unemployed
  - Retired
  - House wife
- 6- Years of treatment
- 7- Number of drugs
- 8- IOP (current reading)
- 9- Payment
  - Full
  - Partial
  - None
- 10- Other co-morbidities

### Section B: Knowledge

- 1- Normal IOP level is ..... mm hg:
  - 5-10
  - 10-20
  - 20-30
  - I don't Know
  
- 2- Alternate options for glaucoma management include:
  - Surgery
  - Laser
  - Both
  - None
  - I don't know
  
- 3- Side effects of Prostaglandins include:
  - Tachycardia and Bronchospasm
  - Redness and trichomegaly
  - Not in use
  - I don't Know
  
- 4- Side effects of Timolol include:
  - Tachycardia and Bronchospasm
  - Redness and trichomegaly
  - Not in use
  - I don't Know
  
- 5- which of the following investigations is needed for your fellow up:
  - FFA
  - Field of vision
  - Ultrasound
  - I don't know
  
- 6- Glaucoma can lead to reduction in the field of vision through optic nerve damage.  
Effective Treatment will:
  - Slow out progression of nerve damage
  - Improve optic nerve through its regeneration
  - I don't know
  
- 7- IOP may decrease after cataract extraction
  - True
  - False
  
- 8- Siblings of glaucoma patient are at risk of developing glaucoma
  - True
  - False

9- Steroids may lead to decreased IOP

- True
- False

10- All patients with glaucoma have increased IOP

- True
- False

### **Section C: Patient preference**

Do you prefer surgical treatment over continuation on medical therapy even if surgical treatment will result in just decreasing number of used medications?

- Yes
- No

### **Section D: Health belief model domain**

#### **I) Perceived Seriousness**

1. Do you think glaucoma medications can lead to irritating side effects?

- Agree
- Neutral
- Disagree

2. Do you think glaucoma medication interferes with your daily activity?

- Agree
- Neutral
- Disagree

3. Do you think that Lifelong glaucoma medications badly affect your quality of life?

- Agree
- Neutral
- Disagree

#### **II) Perceived Susceptibility**

1. I think it is difficult to adhere to medication for life

- Agree
- Neutral
- Disagree

2. I may experience deterioration of my sight even when I am adherent to medication

- Agree

- Neutral
  - Disagree
3. I think my condition needs more follow up while using medication
- Agree
  - Neutral
  - Disagree

### **III) Perceived benefits**

1. Surgical management will be permanent solution to my eye problem
- Agree
  - Neutral
  - Disagree
2. Freedom from medications will improve my quality of life
- Agree
  - Neutral
  - Disagree
3. Surgical treatment will minimize damage caused by glaucoma to my vision
- Agree
  - Neutral
  - Disagree
4. Glaucoma surgery will be more effective in preventing optic nerve damage than medical treatment
- Agree
  - Neutral
  - Disagree

### **IV) Perceived barriers**

1. I think surgical management can cause damage to my eye
- Agree
  - Neutral
  - Disagree
2. I expect worsening of my condition by surgery
- Agree
  - Neutral

- Disagree
3. I think surgical treatment will cost more than I can afford
    - Agree
    - Neutral
    - Disagree
  4. think lifelong medical treatment is safer than surgery
    - Agree
    - Neutral
    - Disagree
  5. My general health condition makes me unfit for surgery
    - Agree
    - Neutral
    - Disagree

**V) Cues to action**

1. Do you have family member or friend who lost vision from glaucoma in spite of use of medication?
  - Yes
  - No
2. Do you have family member or friend who went for successful glaucoma surgery?
  - Yes
  - No
3. Does your doctor prompt surgery than medication?
  - Yes
  - No
4. Did you get any information from media or social contacts that encourage surgery?
  - Yes
  - No

**VI) Self-efficacy**

1. I feel capable of discussing my options to undergo surgery with my physician?
  - Agree

- Neutral
  - Disagree
2. I Can withstand stress of surgery
- Agree
  - Neutral
  - Disagree
3. I know I can comply to my physician instructions before and after surgery
- Agree
  - Neutral
  - Disagree
