# Supplementary material for: Applying the Health Belief Model to predict preference for surgical intervention versus medical therapy among patients with open-angle glaucoma
Source: HighWire-hosted journal article supplement (doi:10.1136/bmjophth-2022-001113), 2022-10-01
Supplement: bmjophth-2022-001113supp002_data_supplement.pdf [file bmjophth-2022-001113supp002_data_supplement.pdf]

**Supplemental table: Confirmatory factor analysis for health belief model items**

| <b>Health belief model</b>                                                                       | <b>Factor1</b> | <b>Factor2</b> | <b>Factor3</b> | <b>Factor4</b> |
|--------------------------------------------------------------------------------------------------|----------------|----------------|----------------|----------------|
| <b>I) Perceived Seriousness</b>                                                                  |                |                |                |                |
| Glaucoma medications can lead to irritating side effects                                         |                | 0.62           |                |                |
| Do you think glaucoma medication interferes with your daily activity?                            |                | 0.90           |                |                |
| I think that Lifelong glaucoma medications badly affect my quality of life                       |                | 0.89           |                |                |
| <b>II) Perceived Susceptibility</b>                                                              |                |                |                |                |
| I think it is difficult to adhere to medication for life                                         |                | 0.72           |                |                |
| I may experience deterioration of my sight even when I am adherent to medication?                |                |                | 0.96           |                |
| I think my condition needs more follow up while using medication                                 |                |                | 0.95           |                |
| <b>III) Perceived benefits</b>                                                                   |                |                |                |                |
| Surgical management will be permanent solution to my eye problem                                 | 0.89           |                |                |                |
| Freedom from medications will improve my quality of life                                         | 0.72           | 0.37           |                |                |
| Surgical treatment will minimize damage caused by glaucoma to my vision                          | 0.91           |                |                |                |
| Glaucoma surgery will be more effective in preventing optic nerve damage than Medical treatment? | 0.90           |                |                |                |
| <b>IV) Perceived barriers</b>                                                                    |                |                |                |                |
| I think surgical management can cause damage to my eye                                           | -0.87          |                |                |                |
| I expect worsening of my condition by surgery                                                    | -0.88          |                |                |                |
| I think surgical treatment will cost more than I can afford                                      | -0.59          |                |                |                |
| I think lifelong medical treatment is safer than surgery                                         | -0.76          |                |                |                |
| My general health condition make me unfit for surgery                                            |                |                |                | -0.94          |
| <b>VI) Self-efficacy</b>                                                                         |                |                |                |                |
| I feel capable of discussing my options to undergo surgery with my physician?                    | 0.87           |                |                |                |
| I Can withstand stress of surgery                                                                | 0.87           |                |                |                |
| I know I can comply to my physician instructions before and after surgery                        | 0.85           |                |                |                |
| <b>Rotated Eigenvalues</b>                                                                       | <b>7.88</b>    | <b>2.96</b>    | <b>2.0</b>     | <b>1.12</b>    |
| <b>% of Variance</b>                                                                             | <b>43.78</b>   | <b>16.45</b>   | <b>11.23</b>   | <b>6.23</b>    |
